# Supplementary material
Source: PubMed Central journal article supplement (PMC3740842)
Supplement: 1311861110_pnas.201311861SI.pdf [file 1311861110_pnas.201311861SI.pdf]

# Supporting Information

Han et al. 10.1073/pnas.1311861110

## SI Methods

**HLA-DQ2.5 Testing.** Subjects were tested for HLA-DQ2.5 by PCR using the following primers: DQA 5'-TCTTATGGTGTAAC-TTGTACCAGTC-3'; DQA 3'-ATCAGACTGTTCAAGTTAT-GTTTTAGG-5'; DQB 5'-GCGTGCCTTGTGAGCAGAA-G-3'; and DQB 3'-CCTGTCCACCGCCCGCTTT-5'.

**Intestinal Biopsy Preparation.** Three to four intestinal biopsy fragments were incubated in Roswell Park Memorial Institute medium (RPMI) with 5% FCS containing 0.5 mg/ml of Type 4 collagenase (Worthington). Cells were periodically disrupted during incubation by passing through a syringe topped with a blunt-ended 16-gauge needle. Lymphocytes were enriched through Percoll (GE Healthcare) gradient centrifugation. CyTOF staining was performed on freshly isolated lymphocytes.

**Flow Cytometry.** The following antibody clones were used for flow cytometry: anti-CD3 (SK7; Biolegend), anti-CD4 (RPA-T4; Biolegend), anti-CD8 (OKT8; eBioscience), anti- $\gamma\delta$ -T-cell receptor (TCR) (MHGD04; Invitrogen), anti-CD38 (HIT2; Biolegend), anti-integrin- $\beta 7$  (FIB504; eBioscience), anti-CD103 (Ber-ACT8; Biolegend), anti-CD27 (O323; eBioscience), and anti-NKG2D (1D11; Biolegend). Dead cells were excluded using a LIVE/DEAD Fixable Dead Cell Stain Kit (Invitrogen).

**Time-of-Flight Mass Cytometry Staining.** Time-of-flight mass cytometry (CyTOF) and data acquisition were performed as described (1). Antibodies used for mass cytometry included: anti-integrin- $\beta 7$  (FIB504; Biolegend), anti-CD103 (B-Ly7; Biolegend), anti- $\gamma\delta$ TCR [using anti-Phycoerythrin (PE) (PE001; Biolegend) as secondary, with PE-labeled  $\gamma\delta$ TCR (SA6.E9; Invitrogen) as primary], anti-IL-17 (BL168; Biolegend), anti-IL-4 (8D4-8; Becton Dickinson), anti-IL-10 [using a biotinylated primary antibody (JES3-12G8; Biolegend), and heavy metal-conjugated streptavidin as secondary as described (1)], anti-CD5 (UCHT2; Biolegend), anti-CD25 (M-A251; Becton Dickinson), anti-CD95 (DX2; Biolegend), and anti-CTLA-4 (BNI3; Becton Dickinson). All other antibody clones used for CyTOF can be found in Newell et al. (1). Cryopreserved peripheral blood mononuclear cells (or freshly isolated intestinal lymphocytes) were thawed and washed with complete RPMI before overnight recovery at 37 °C. Cells were transferred to 96-well plates (or tubes), washed, and resuspended in cytometry buffer [PBS, 0.05% sodium azide, 2 mM EDTA, 2% (vol/vol) FCS] for staining as previously described (1). For stimulation, all cells were cultured for 3 h at  $\sim 15 \times 10^6$  per mL in complete RPMI [10% (vol/vol) FCS] plus 1 $\times$  brefeldin A (eBioscience), 1 $\times$  monensin (eBioscience), 2.5  $\mu$ g/mL anti-CD107a, 1.25  $\mu$ g/mL anti-CD107b, and 10  $\mu$ M TAPI-2 (VWR International). For phorbol-12-myristate-13-acetate+ionomycin stimulation, 150 ng/mL PMA + 1  $\mu$ M ionomycin was added to the cells.

At the end of the 3-h stimulation, cells were pipetted vigorously to remove adherent cells from the plate and transferred to 96-well plates (or tubes), washed, and resuspended in cytometry buffer. The cells were incubated for 30 min on ice with a prepared mixture of metal-conjugated surface-marker antibodies at concentrations found to be effective in prior antibody tests. After surface staining, cells were washed once and resuspended in 20  $\mu$ M  $^{115}$ In-loaded maleimido-monoamine-DOTA (1,4,7,10-tetraazacyclododecane-1,4,7,10-tetraacetic acid) in PBS [a sulfhydryl-reactive trivalent cation-chelating bifunctional ligand; Macrocytics B-272; mixed with a 0.5 molar ratio of  $^{115}$ InCl and

stock solution dissolved in L-buffer (DVS Sciences) at 1 mM, stable at 4 °C, and working much like commercially available amine-reactive LIVE/DEAD staining reagents (Invitrogen)]. Cell fixation using paraformaldehyde (Electron Microscopy Sciences), DNA labeling with an iridium-containing DNA intercalator (DVS Sciences), intracellular staining, washing, and data acquisition was performed as described (1).

**TCR Sequencing.** A series of three nested PCRs was performed on single sorted T cells. For the first reaction, reverse transcription and preamplification were performed with a One-Step RT-PCR Kit (Qiagen) using multiplex PCR with multiple V $\beta$  or V $\delta$  region primers and a C $\beta$  or C $\delta$  region primer. When necessary, base degeneracy was incorporated into the primers to account for TCR polymorphism and ensure amplification of all known functional TCRV $\beta$  or TCRV $\delta$  and TCR C $\beta$  and C $\delta$  regions identified in the international ImMunoGeneTics information system (IMGT) database ([www.imgt.org](http://www.imgt.org)). Next, an aliquot of the first reaction was used as a template for the second PCR using a set of multiple internally nested TCRV $\beta$  or TCRV $\delta$  primers and an internally nested C $\beta$  or C $\delta$  primer with a Hot-StarTaq DNA Polymerase Kit (Qiagen). The second set of TCRV region primers also incorporated base degeneracy when needed and contained a common 23-base sequence at the 5' end to enable further amplification with a common 23-base primer. The third and final PCR was performed on an aliquot of the second reaction using a primer containing the common 23-base sequence (incorporated into the second set of V $\beta$  primers) and a third internally nested C $\beta$  or C $\delta$  primer using HiFi Hotstar DNA polymerase (Qiagen). Amplified PCR products were treated with ExoSAP-IT (Affymetrix) and sequenced using primers from the final PCR from both ends. Primer sequences for TCR $\beta$  sequencing can be found in Su et al. (2). Primer sequences for TCR $\delta$  can be found in Table S4.

**TCR Sequence Analysis.** TCR sequence analysis was performed with VDJFasta (3). Segment classification was performed to reference segment databases from the IMGT. CDR3 from all domains was extracted and translated using TCR-specific profile hidden Markov models, constructed from 95% nonredundant concatenations of IMGT V, D, and J segments. TCR junctional analysis was performed using IMGT/V-Quest ([www.imgt.org/](http://www.imgt.org/)). A dataset of 165,291 naive CD8 $^{+}$  TCR $\beta$  sequences (4) was used as a control for CDR3 $\beta$  convergence. To generate TCR $\delta$  reference sequences, between  $10^5$  and  $10^6$  TCR $\gamma\delta^{+}$  T cells from the peripheral blood (PB) of eight different individuals and intraepithelial lymphocytes (IELs) from one individual were sorted by flow cytometry. RNA was extracted using an RNeasy RNA extraction kit (Qiagen). RNA from each of these samples was amplified and sequenced using the primers described above. Sequencing was performed by using an Illumina MiSeq platform after incorporation of Illumina paired-end adapters through PCR. As a control for TCR $\delta$  convergence, 18,579 total unique TCR $\delta$  sequences using TRDV1 were used. Motif enrichment was evaluated by comparing the observed vs. expected frequency of 2-mer and 3-mer motifs within CDR3 $\beta$  or CDR3 $\delta$  clones using the same V region. Enrichment is represented as the odds of encountering enrichment of the motif in the reference dataset to the degree observed in the selected set. The significance of motif enrichment was evaluated by using the Fisher's exact test with the Bonferroni

correction such that  $P$  values  $<0.05/\text{howmany}$  =  $1e-4$  were considered to be statistically significant. Analysis was per-

formed in R version 2.11.1. The most statistically significant examples are illustrated.

1. Newell EW, Sigal N, Bendall SC, Nolan GP, Davis MM (2012) Cytometry by time-of-flight shows combinatorial cytokine expression and virus-specific cell niches within a continuum of CD8(+) T cell phenotypes. *Immunity* 36(1):142–152.
2. Su LF, Kidd BA, Han A, Kotzin JJ, Davis MM (2013) Virus-specific CD4(+) memory-phenotype T cells are abundant in unexposed adults. *Immunity* 38(2):373–383.

3. Glanville J, et al. (2011) Naive antibody gene-segment frequencies are heritable and unaltered by chronic lymphocyte ablation. *Proc Natl Acad Sci USA* 108(50):20066–20071.
4. Warren RL, et al. (2011) Exhaustive T-cell repertoire sequencing of human peripheral blood samples reveals signatures of antigen selection and a directly measured repertoire size of at least 1 million clonotypes. *Genome Res* 21(5):790–797.

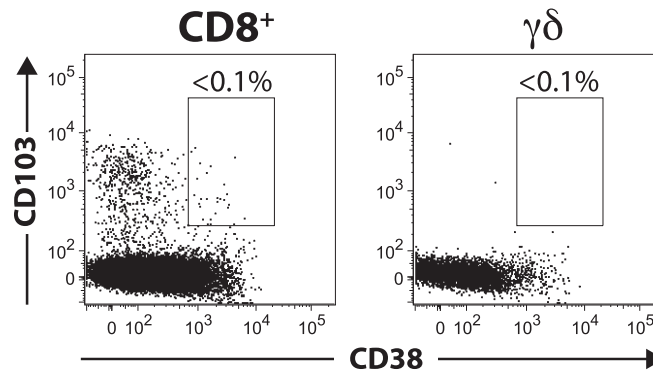

**Fig. S1.** Patients with active celiac disease (CD), as determined by ongoing symptoms and positive autoantibody titers, have  $\alpha E\beta 7^+CD38^+CD8^+$  and  $\gamma\delta$  T-cell proportions below background levels of 0.05% and 0.01%, respectively. Representative FACS analysis of CD8<sup>+</sup>  $\alpha\beta$  and  $\gamma\delta$  T cells with respect to CD103 ( $\alpha E$  integrin) and CD38.

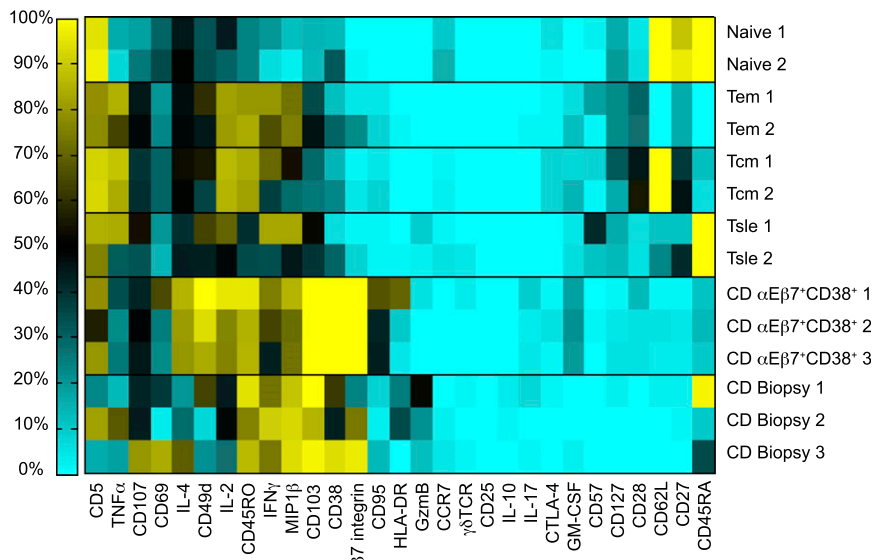

**Fig. S2.** Phenotype and functional capacity of  $\alpha E\beta 7^+CD38^+CD8^+$  T cells resemble effector memory cells and CD8<sup>+</sup> IELs. Functional capacities of the indicated cell types with respect to the indicated markers are plotted as a heat plot. The color scale is shown (Left) and indicates the percentage of cells expressing the indicated marker. Cells were stimulated with PMA and ionomycin and analyzed for the indicated cell-surface or intracellular markers. Cells were segregated based on stringent criteria based on the gates indicated: naive ( $CD45RA^+CD27^+CD62L^+CCR7^+$ ), effector memory (Tem;  $CD45RA^-CD27^-CD62L^-CCR7^-$ ), central memory (Tcm;  $CD45RA^-CD27^+CD62L^+CCR7^+$ ), short-lived effector (Tsle;  $CD45RA^+CD27^-CD62L^-CD28^-$ ), celiac PB ( $CD3^+\alpha E\beta 7^+CD38^+CD8^+$ ), and celiac biopsy ( $CD3^+CD8^+$ ). All blood samples analyzed are from celiac patients on day 6 following gluten challenge. Biopsy samples are from different celiac patients with active celiac disease including villous blunting and IEL expansion by histologic examination.

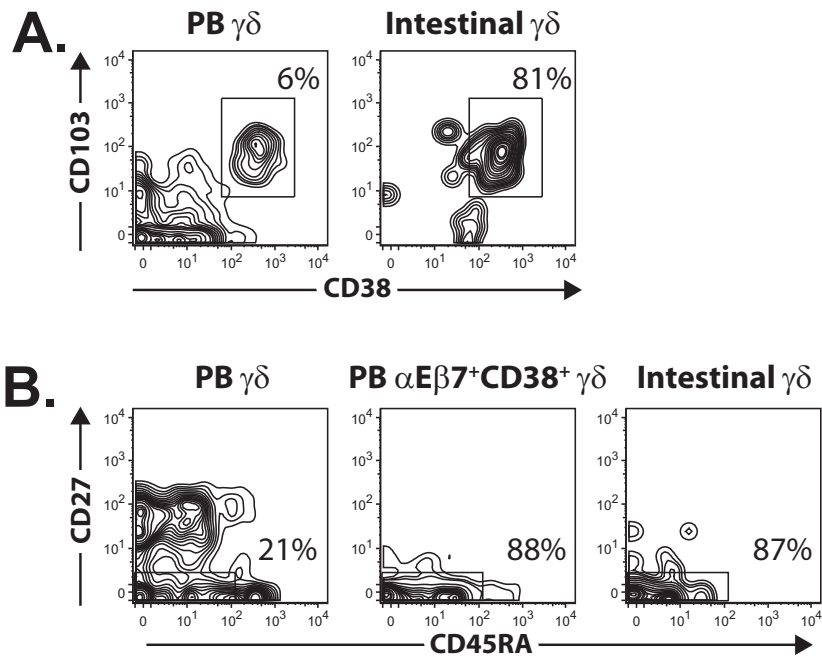

**Fig. 53.** Peripheral blood  $\alpha E\beta 7^+ CD38^+$   $\gamma\delta$  T cells induced by oral gluten challenge express surface markers of memory cells and resemble intestinal epithelial  $\gamma\delta$  T lymphocytes from celiac mucosal biopsies. (A) CyTOF analysis of total peripheral blood  $\gamma\delta$  and total intestinal  $\gamma\delta$  T cells with respect to CD103 and CD38 expression. (B) CyTOF analysis of total peripheral blood  $\gamma\delta$ ,  $\alpha E\beta 7^+ CD38^+$   $\gamma\delta$ , and total celiac intestinal  $\gamma\delta$  with respect to CD27 and CD45RA expression.  $\alpha E\beta 7^+ CD38^+$   $\gamma\delta$  and celiac intestinal  $\gamma\delta$  T cells are predominantly CD27<sup>-</sup> and CD45RA<sup>-</sup>, consistent with a memory phenotype.

**A.**

| Patient 1<br>$\alpha E\beta 7^+ CD38^+ CD8$ | TCR $\beta$ CDR3  | Freq 1<br>(98) | Freq 2<br>(94) |
|---------------------------------------------|-------------------|----------------|----------------|
|                                             | CASSPGTDTQYF      | 9              | 20             |
|                                             | CSVEMNTEAFF       | 2              | 13             |
|                                             | CASSFGGELFF       | 5              | 1              |
|                                             | CASSAGHPEQFF      | 3              | 3              |
|                                             | CASSNLRQGAAGNTIYF | 3              | 3              |
|                                             | CASSQEEQGAFYEQFF  | 3              | 3              |
|                                             | CASTEGQAEAFF      | 3              | 2              |
|                                             | CASSLINTEAFF      | 3              | 1              |
|                                             | CSVDGNYLTDQYF     | 3              | 1              |
|                                             | CAWSVKTLRRADTQYF  | 1              | 3              |
|                                             | CASRIQEGGSPLHF    | 2              | 1              |
|                                             | CASSLASVGSTEAFF   | 1              | 2              |
|                                             | CASEMDANTGELFF    | 1              | 1              |
| CASSPFSGDYEQYF                              | 1                 | 1              |                |

**B.**

| Patient 2<br>$\alpha E\beta 7^+ CD38^+ CD8$ | TCR $\beta$ CDR3  | Freq 1<br>(127) | Freq 2<br>(75) |
|---------------------------------------------|-------------------|-----------------|----------------|
|                                             | CASSYDVRSGNYEQYF  | 5               | 1              |
|                                             | CASSVGGVQPQHF     | 4               | 2              |
|                                             | CASNLAGGSNEQFF    | 2               | 1              |
|                                             | CASSKLDSGYTF      | 1               | 1              |
|                                             | CASSLGRVEAFF      | 1               | 1              |
|                                             | CASSLSQGGHNEQFF   | 1               | 1              |
|                                             | CASSPTSGRTTSYEQYF | 1               | 1              |
|                                             | CASSQDGGTYNEQFF   | 1               | 1              |
|                                             | CASSSTPGGLWYGYTF  | 1               | 1              |
|                                             | CASTAGFNQPQHF     | 1               | 1              |

**C.**

| Patient 1<br>$\alpha E\beta 7^+ CD38^+ \gamma\delta$ | TCR $\delta$ CDR3            | Freq 1<br>(96) | Freq 2<br>(56) |
|------------------------------------------------------|------------------------------|----------------|----------------|
|                                                      | CALGGLPTLGDTPTDKLIF          | 59             | 17             |
|                                                      | CALCLLADWGYTDKLIF            | 5              | 1              |
|                                                      | CALGELRSLHLHWGIRTDKLIF       | 1              | 4              |
|                                                      | CALGDGGGFYTSRVLGGYAFVTTDKLIF | 2              | 2              |
|                                                      | CALGELPYWALRGADKLIF          | 2              | 1              |
|                                                      | CALGGSGISYVVGILGKLIF         | 1              | 2              |
|                                                      | CALGEFFPRYWGTTYTDKLIF        | 1              | 1              |
|                                                      | CALGELQPRYWGRFDKTKLFF        | 1              | 1              |
|                                                      | CALGFPPVLGDPYTDKLIF          | 1              | 1              |

**Fig. 54.** Identical  $\alpha E\beta 7^+ CD38^+ CD8^+$  and  $\alpha E\beta 7^+ CD38^+ \gamma\delta$  TCR clones reappear in celiac patients upon repeat gluten challenge. (A and B) Identical  $\alpha E\beta 7^+ CD38^+ CD8^+$  TCR $\beta$  clones are reencountered upon repeat gluten challenge within the same patient. All TCR $\beta$  sequences reoccurring in the same individual upon repeat challenge are shown. CDR3 $\beta$  motif and frequency are indicated. (C) Identical  $\alpha E\beta 7^+ CD38^+ \gamma\delta$  TCR clones are reencountered upon repeat gluten challenge within the same patient. All TCR $\delta$  sequences reoccurring in the same individual upon repeat challenge are shown. CDR3 $\delta$  motif and frequency are indicated.
